# Supplementary material for: Climate Change Cannot Explain the Upsurge of Tick-Borne Encephalitis in the Baltics
Source: PLoS One. 2007 Jun 6;2(6):e500. doi: 10.1371/journal.pone.0000500 (PMC1876807; doi:10.1371/journal.pone.0000500)
Supplement: Table S1 — Annual, monthly and dekadal (for April) mean daily maximum temperatures oC for 1989–2004 (columns A), and increases or decreases relative to 1970–88 (columns B). Statistically significant (p<0.05) changes are shown in bold. (0.05 MB XLS) [file pone.0000500.s001.xls]

## Sheet: Sheet1
	Estonia
County	Läänemaa		Saaremaa		Harjumaa		Pärnumaa		Ida-Virumaa		Jõgevamaa		Tartumaa		Võrumaa
Site of met station	23.78oE 58.97oN		22.05oE 57.915oN		24.75oE 59.45oN		24.50oE 58.37oN		27.42oE 59.37oN		26.40oE 58.75oN		26.72oE 58.385oN		27.00oE 57.85oN
	A	B	A	B	A	B	A	B	A	B	A	B	A	B	A	B
Annual	10.2	1.16	9.64	1.24	9.74	1.1	10.23	1.38	9.1	0.94	9.66	1.12	10.01	1.06	10.35	1.25
Jan	-0.01	2.67975	1.69	2.4358	-0.13	2.65944	-0.12	2.9179	-1.65	2.70016	-1.23	3.08311	-1.03	3.09344	-0.77	3.1841
Feb	-0.05	2.82891	1.31	2.98099	-0.18	2.93094	-0.29	2.59717	-1.42	2.92638	-0.95	3.07614	-0.65	3.10318	-0.29	2.83781
Mar	3.23	1.9608	2.7	2.00405	3.11	1.96544	3.15	2.02703	2.13	1.49749	3.08	1.98075	3.46	1.96128	3.98	1.91416
Apr	10.45	2.69788	6.9	1.98298	9.58	2.42615	10.31	3.24674	9.79	2.3557	10.63	2.51576	11.26	2.47002	11.74	2.60891
May	15.93	-0.147482	12.28	0.700424	14.81	-0.168361	16.19	0.480352	15.11	-0.360888	16.16	-0.282729	16.63	-0.265334	17.19	-0.0382466
June	19.62	-0.273114	16.88	0.447118	18.97	-0.0736075	20.1	0.271217	19.27	-0.0943092	20.07	-0.0577741	20.36	-0.0722149	20.9	0.110208
July	22.58	1.10095	19.84	1.13672	21.86	0.870118	22.73	1.44085	21.94	0.772428	22.58	0.982289	22.89	0.869227	23.2	1.08753
Aug	21.55	1.35563	19.97	1.40912	20.69	1.00188	21.63	1.57357	20.58	0.774063	21.31	1.07171	21.59	0.936105	21.86	0.999718
Sep	15.84	1.20263	15.67	1.27566	15.3	1.0077	15.99	1.34458	14.79	0.666294	15.28	0.920921	15.46	0.69432	15.7	0.857083
Oct	9.39	0.125287	10.22	0.153188	9.1	0.0858323	9.45	0.217771	8.15	-0.127206	8.42	-0.0580492	8.8	-0.0794926	9.06	0.027184
Nov	3.32	-0.328246	5.69	0.0677569	3.16	-0.239232	3.38	-0.150636	11.64	-0.681327	1.92	-0.393366	2.17	-0.476075	2.41	-0.358904
Dec	0.57	0.710842	2.78	0.525988	0.58	0.730698	0.29	0.633462	-1.17	0.34827	-1	0.626703	-0.86	0.440057	-0.82	0.473012
Apr dekad 1	6.84	0.575789	4.48	0.750561	6.5	0.609408	6.85	1.00382	6.33	0.321711	7.1	0.506414	7.66	0.313816	8.13	0.261349
Apr dekad 2	10.1	2.81155	6.58	1.86982	9.28	2.45487	9.99	3.74253	9.51	2.60655	10.29	2.7174	10.95	2.66112	11.41	2.90684
Apr dekad 3	14.42	4.70632	9.65	3.32856	12.97	4.21418	14.09	4.99388	13.54	4.13885	14.51	4.32345	15.18	4.43513	15.68	4.65855
	Latvia
County	Jelgava		Talsi		Liepaja		Gulbene		Rezekne		Kraslava
Site of met station	23.73oE 59.65oN		22.53oE 57.15oN		21.02oE 56.52oN		26.75oE 57.18oN		27.33E 56.52oN		27.53oE 56.10oN
	A	B	A	B	A	B	A	B	A	B	A	B
Annual	11.33	1.1	10.6	1.07	10.87	0.99	9.88	1.07	9.96	1.14	9.99	1.12
Jan	0.67	3.06085	0.55	2.59609	1.88	2.49259	-1.36	3.1053	-1.53	3.09133	-1.48	3.20395
Feb	1.45	3.22766	0.97	2.82965	1.99	2.60815	-0.7	2.82863	-0.83	2.90295	-0.56	3.15348
Mar	5.08	2.04623	4.18	1.90517	4.32	1.30906	3.41	1.87773	3.45	1.95684	3.41	2.00006
Apr	12.33	2.40351	10.98	2.38981	10.57	2.68041	11.43	2.45345	11.68	2.62424	11.57	2.41865
May	17.71	0.000344896	16.54	0.203996	15.24	0.0145484	16.93	-0.114461	17.14	-0.0800249	17.21	-0.0708014
June	20.87	0.00743421	19.74	0.083114	18.29	0.159638	20.45	0.241326	20.39	0.0895921	20.47	0.13432
July	23.32	1.19961	22.11	1.12377	21.25	1.23225	22.78	1.25525	22.79	1.17383	22.81	1.29384
Aug	22.71	1.12658	21.69	1.17805	21.47	1.44646	21.49	1.02938	21.72	1.03822	21.3	0.452392
Sep	16.91	0.622785	16.06	0.82298	16.58	0.776996	15.34	0.679554	15.62	0.910099	15.61	0.692632
Oct	1.58	-0.0413347	9.62	-0.299662	11.03	-0.124019	8.56	-0.0938529	8.91	0.279884	9	0.35865
Nov	3.94	-0.385099	3.62	-0.477083	5.32	-0.626831	1.88	-0.448991	1.95	-0.299156	1.93	-0.397357
Dec	0.4	-0.105849	0.69	0.0552891	2.45	-0.0388038	-1.58	0.0732552	-1.73	0.00469498	-1.86	-0.21369
Apr dekad 1	8.79	-0.0728947	7.5	0.00963816	7.58	0.377862	7.83	0.290033	8.12	0.507599	7.92	0.267632
Apr dekad 2	11.79	2.20829	10.47	2.10158	10.04	2.56444	11.05	2.57569	11.24	2.69539	11.09	2.38072
Apr dekad 3	16.42	5.07513	14.97	5.05822	14.08	5.09891	15.41	4.49463	15.68	4.66974	15.72	4.6076
	Lithuania
County	Siauliai		Klaipeda		Kaunas		Birzai		Utena		Vilnius
Site of met station	23.32oE 55.93oN		21.15oE 55.72oN		23.92oE 54.90oN		24.75oE 56.20oN		25.60oE 55.50oN		25.27oE 54.67oN
	A	B	A	B	A	B	A	B	A	B	A	B
Annual	11.06	1.1	11.1	1.02	11.35	1.02	10.89	1.04	11.05	1.07	11.01	1.01
Jan	0.28	2.8557	1.89	2.44112	-0.01	2.74923	-0.28	2.91908	-0.4	2.86	-0.66	2.8
Feb	1.18	3.19638	2.2	2.5705	1.31	3.0466	0.56	3.08607	0.75	3.07	0.76	2.92
Mar	4.73	2.02917	4.48	1.1602	4.98	1.64518	4.44	1.95296	4.76	1.89	4.69	1.48
Apr	12.03	2.35833	10.83	2.54145	12.65	2.15559	12.2	2.36776	12.59	2.42	12.54	2
May	17.64	0.182018	15.42	-0.147259	18.38	0.225877	17.89	-0.0139254	18.19	0.16	18.16	-0.04
June	20.74	0.253289	18.48	0.390022	21.11	0.207566	20.98	0.100219	21.23	0.33	21.18	0.45
July	23.15	1.46261	21.46	1.57127	23.54	1.4364	23.31	1.32094	23.55	1.33	23.46	1.41
Aug	22.61	1.22588	21.85	1.63662	23.09	1.14748	22.54	1.01009	22.59	0.89	22.86	1.02
Sep	16.43	0.492325	17.06	0.978618	17	0.592325	16.51	0.633882	16.54	0.64	16.69	0.59
Oct	10.29	0.0278509	11.4	0.0817982	10.63	0.158991	10.01	0.0851974	10.11	0.13	10.11	0.06
Nov	3.59	-0.517763	5.54	-0.713048	3.67	-0.533333	3.13	-0.581689	3.19	-0.46	3.16	-0.38
Dec	0.09	-0.329386	2.57	-0.245614	-0.13	-0.623904	-0.58	-0.377741	-0.5	-0.55	-0.85	-0.64
Apr dekad 1	8.38	-0.229276	7.76	-0.0796053	9.01	-0.709539	8.52	-0.149671	8.84	-0.34	8.89	-0.89
Apr dekad 2	11.52	2.32401	10.52	2.96612	12.2	2.43158	11.81	2.6125	12.26	2.89	12.21	2.38
Apr dekad 3	16.18	4.98026	14.21	4.73783	16.75	4.74474	16.26	4.64046	16.67	4.7	16.53	4.52
